# Supplementary material for: Lanthanide-activated scheelite nanocrystal phosphors prepared by the low-temperature vapor diffusion sol–gel method
Source: Royal Society of Chemistry journal article supplement (doi:10.1039/c6dt03382b), 2016-01-01
Supplement: c6dt03382b1.pdf [file c6dt03382b1.pdf]

*Electronic Supplementary Information*

**Lanthanide-activated scheelite nanocrystal phosphors prepared by the  
low-temperature vapor diffusion sol-gel method**

Sean P. Culver, Patrick Cottingham and Richard L. Brutchey\*

\*To whom correspondence should be addressed. Email: brutchey@usc.edu.

Department of Chemistry, University of Southern California, Los Angeles, CA 90089, USA

**Experimental**

**General Considerations.** All manipulations were conducted under a nitrogen atmosphere at ambient pressure using standard Schlenk techniques.  $W(OEt)_6$  ( $Et = CH_2CH_3$ ) and  $Tm(acac)_3$  ( $acac = \text{acetylacetonate}, C_5H_7O_2$ ) from Alfa Aesar,  $Eu(acac)_3$  and  $Tb(acac)_3$  from Sigma Aldrich, and an alcoholic solution of  $Ca(OCH_2CH_2OCH_3)_2$  (20 wt% in methoxyethanol) from Gelest, Inc. were used as precursors. Methoxyethanol was purchased from Sigma Aldrich. All reagents were used as received.

**Nanocrystal Synthesis.** Lanthanide (Ln)-doped  $CaWO_4$  nanocrystals were synthesized via a vapor diffusion sol-gel method described in detail elsewhere.<sup>1,2</sup> Briefly, a rotameter controls the flow of the nitrogen carrier gas through a glass bubbler filled with 0.75 M aqueous HCl, connected via Tygon tubing to a 100 mL, 3-neck round bottom flask containing the precursor solution. In a typical synthesis, 454 mg (1.0 mmol)  $W(OEt)_6$  and the appropriate mass of  $Ln(acac)_3$  (e.g., 4.5 mg  $Eu(acac)_3$  (0.01 mmol)) were employed for the synthesis of nominal  $CaWO_4:1\%Eu$  were added to 1.0 mL (1.0 mmol)  $Ca(OCH_2CH_2OCH_3)_2$ . The resulting mixture was diluted to 2.0 mL total volume with methoxyethanol and stirred at 80 °C under flowing dry

nitrogen for 2 h, after which complete dissolution of the reagents was observed. Once cooled, the solution was exposed to a controlled flow of water vapor for 48 h at room temperature and atmospheric pressure. Diffusion of water vapor into the solution resulted in the formation of a cracked gel, which was subsequently aged under a nitrogen atmosphere for 24 h at 60 °C. The resulting gel was collected, washed with absolute ethanol ( $3 \times 10$  mL), and vacuum dried at room temperature to recover an off-white fine powder consisting of  $\text{CaWO}_4\text{:Ln}$  nanocrystals.

**Thermogravimetric Analysis (TGA).** TGA analyses were performed using a thermogravimetric analyzer TA Q50 (TA Instruments) under a high-purity air flow ( $60 \text{ mL min}^{-1}$ ). Samples were heated from 25 to 600 °C at a linear rate of  $15 \text{ °C min}^{-1}$  and held isothermal for 15 min.

**Powder X-ray Diffraction (XRD).** XRD patterns were collected in the  $10\text{--}80^\circ 2\theta$  range using a Rigaku Ultima IV diffractometer operated at 44 mA and 40 kV.  $\text{Cu K}\alpha$  radiation ( $\lambda = 1.5406 \text{ \AA}$ ) was employed. The step size and collection time were  $0.0075^\circ$  and 5 s per step, respectively. All diffraction patterns were recorded under ambient conditions.

**Rietveld Analysis.** Rietveld structural refinements were carried out using the General Structure Analysis System (GSAS) software.<sup>3,4</sup> The average crystal structure of  $\text{AWO}_4$  nanocrystals was refined with the tetragonal  $I4_1/a$  (no. 88) space group. The following parameters were refined: (1) scale factor, (2) background, which was modeled using a shifted Chebyshev polynomial function, (3) peak shape, which was modeled using a modified Thomson–Cox–Hasting pseudo-Voigt function,<sup>5</sup> (4) lattice constants ( $a$  and  $c$ ), (5) fractional atomic coordinates of the oxygen atom ( $x_{\text{O}}$ ,  $y_{\text{O}}$ ,  $z_{\text{O}}$ ), and (6) an isotropic thermal parameter for each chemical species (i.e.,  $U_{\text{A}}$ ,  $U_{\text{W}}$ , and  $U_{\text{O}}$ ). The usual  $R_{\text{wp}}$  and  $\chi^2$  indicators were employed to assess the quality of the refined structural models.<sup>6</sup>

**Transmission Electron Microscopy (TEM).** TEM images were obtained using a JEOL JEM2100F (JEOL Ltd.) electron microscope operating at 200 kV. Samples for TEM studies were prepared by drop-casting a stable suspension of nanocrystals in ethanol on a 400 mesh Cu grid coated with a lacey carbon film (Ted Pella, Inc.).

**Inductively Coupled Plasma – Atomic Emission Spectroscopy (ICP-AES).** Elemental analyses were conducted at Galbraith Laboratories (Knoxville, TN).

**Spectrofluorometry.** Excitation and emission spectra of  $\text{CaWO}_4\text{:Ln}$  powders were recorded using a Horiba Nanolog spectrofluorometer equipped with a 450 W Xe lamp as the excitation source using slit widths of 4 nm and a photomultiplier tube as the detector. PL lifetime measurements were performed on a Photon Technology International QuantaMaster Model C-60 spectrofluorometer equipped with a Xe flash lamp as the excitation source. Lifetimes for the  $\text{CaWO}_4\text{:Eu}$  and  $\text{CaWO}_4\text{:Tb}$  nanocrystals were well fit with a monoexponential function and the  $\text{CaWO}_4\text{:Tm}$  nanocrystals were fit with a biexponential (the longer lifetime, associated with the lanthanide was reported). All spectra were collected under ambient conditions.

## References

1. F. A. Rabuffetti and R. L. Brutchey, *Chem. Mater.*, 2011, **23**, 4063.
2. S. P. Culver, F. A. Rabuffetti, S. Zhou, M. Mecklenburg, Y. Song, B. C. Melot and R. L. Brutchey, *Chem. Mater.*, 2013, **25**, 4129.
3. A. C. Larson and R. B. Von Dreele, *General Structure Analysis System (GSAS)*, Los Alamos National Laboratory: Los Alamos, NM, 2000.
4. B. H. Toby, *J. Appl. Crystallogr.*, 2011, **34**, 210.
5. P. Thompson, D. E. Cox and J. M. Hastings, *J. Appl. Crystallogr.*, 1987, **20**, 79.
6. R. A. Young, *The Rietveld Method*, Oxford University Press: New York, 1993.

## Figures and Tables

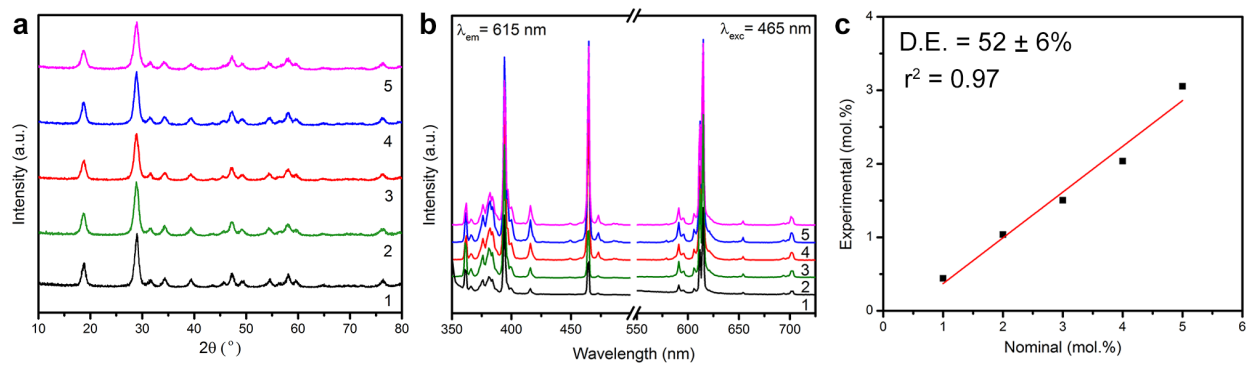

**Fig. S1** (a) XRD, (b) PL, and (c) ICP results for 1–5 mol.%  $\text{CaWO}_4\text{:Ln}$  nanocrystals.

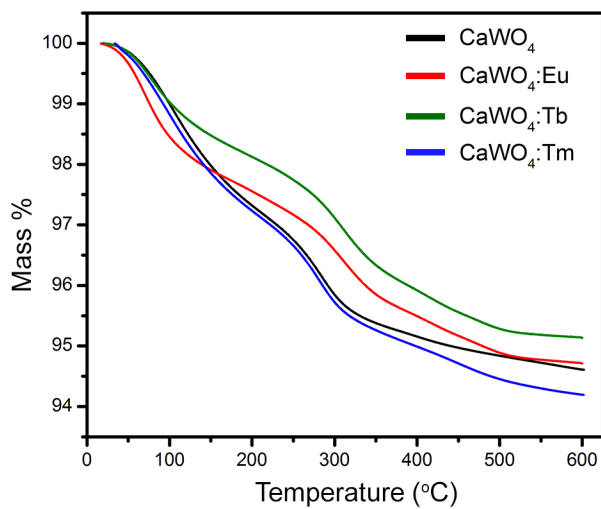

**Fig. S2** TGA thermograms for undoped and  $\text{CaWO}_4\text{:Ln}$  nanocrystals.

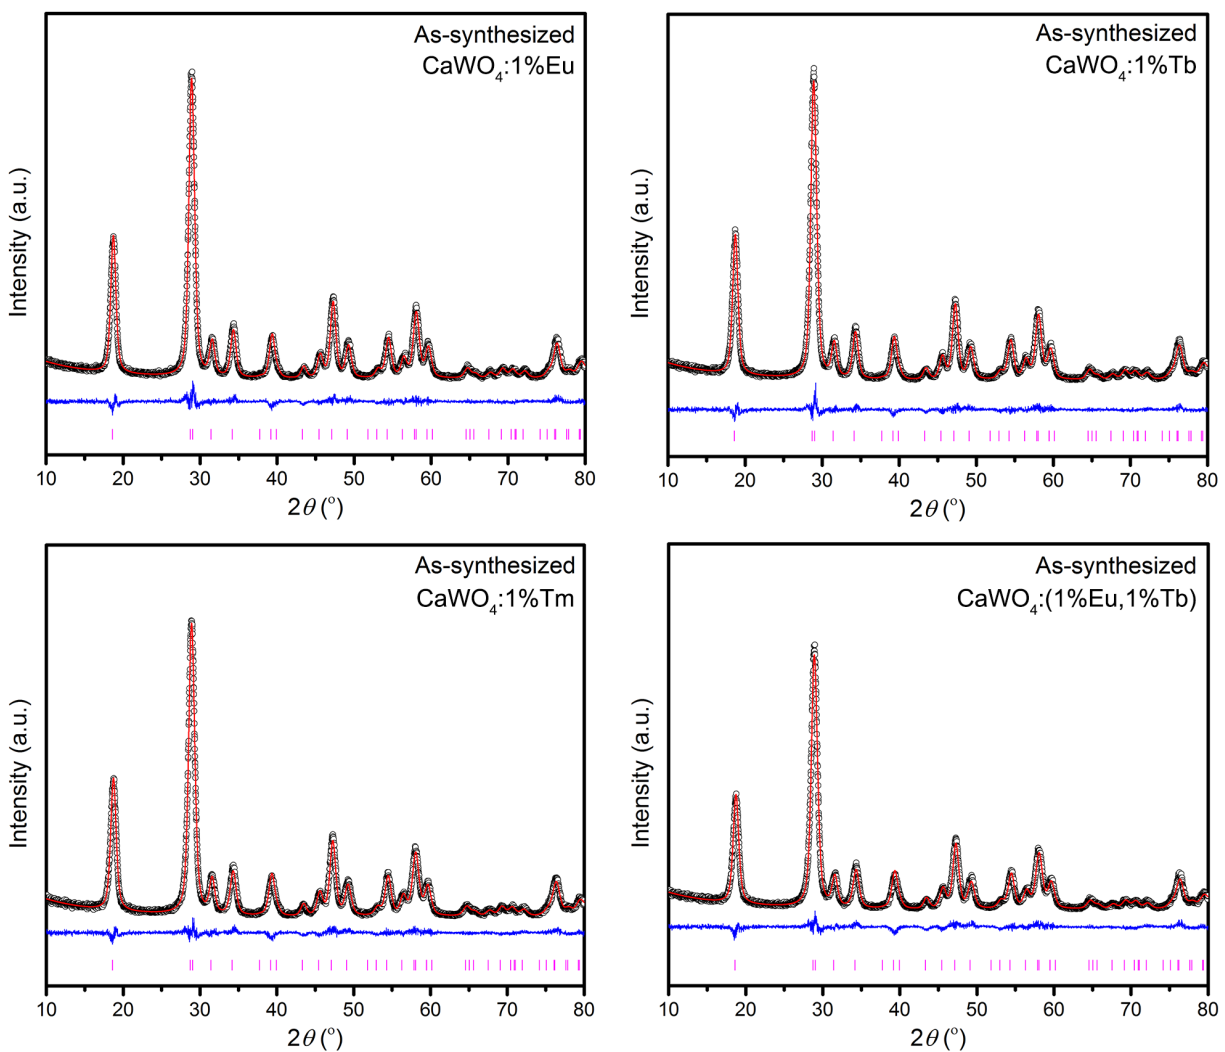

**Fig. S3** Rietveld analysis of powder XRD patterns for the as-synthesized  $\text{CaWO}_4:\text{Ln}$  nanocrystals. Experimental ( $\circ$ ) and calculated ( $—$ ) patterns are shown, along with the difference curve ( $—$ ). Tickmarks ( $|$ ) corresponding to the phase refined are provided.

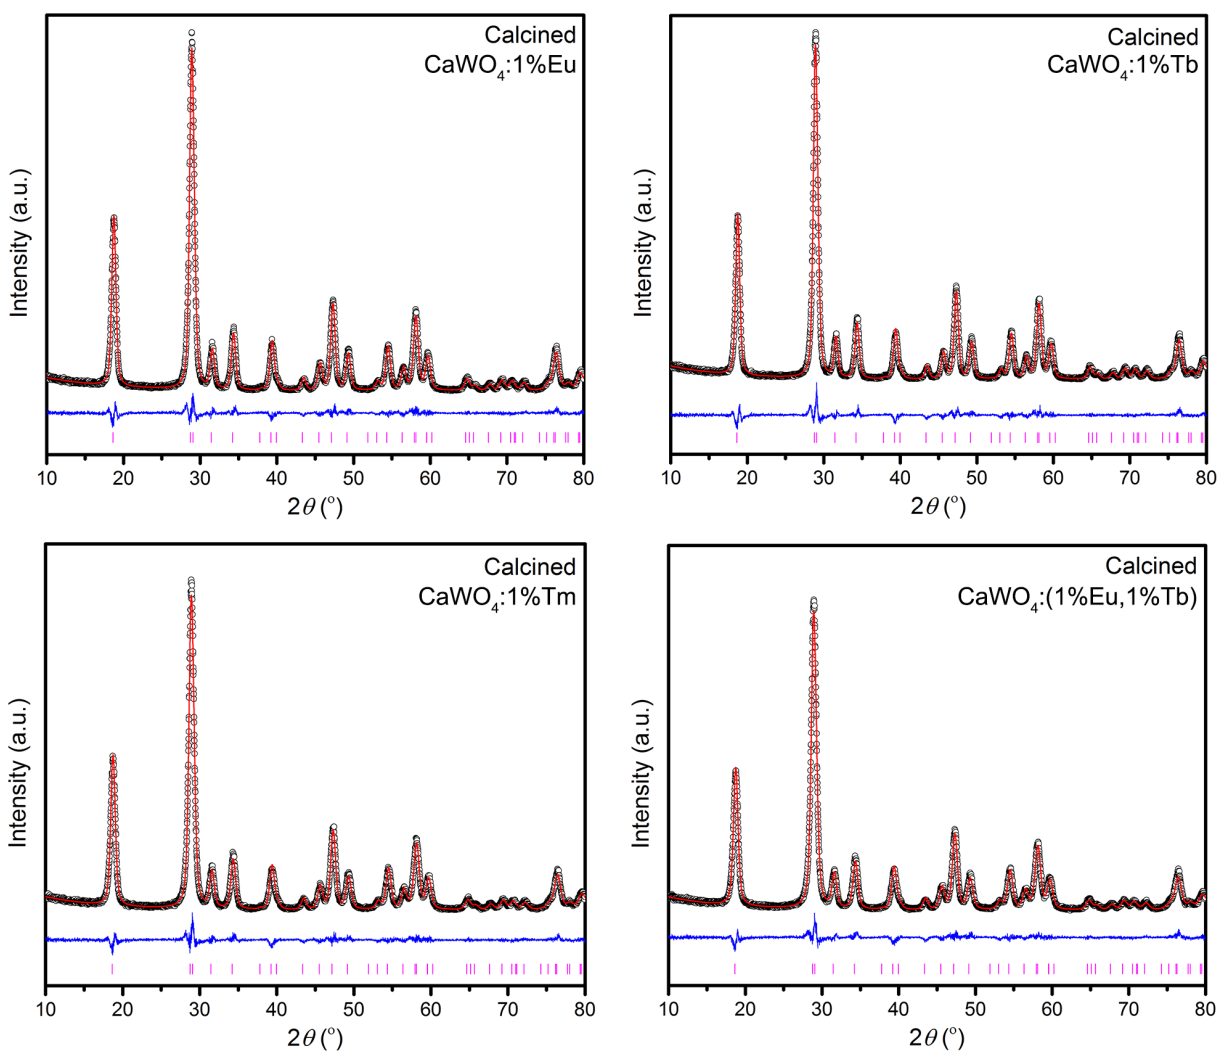

**Fig. S4** Rietveld analysis of powder XRD patterns for the calcined  $\text{CaWO}_4:\text{Ln}$  nanocrystals. Experimental ( $\circ$ ) and calculated ( $—$ ) patterns are shown, along with the difference curve ( $—$ ). Tickmarks ( $|$ ) corresponding to the phase refined are provided.

**Table S1** Structural Parameters of As-synthesized Ln-Doped CaWO<sub>4</sub> Nanocrystals

|                                         | CaWO <sub>4</sub> | CaWO <sub>4</sub> :1%Eu | CaWO <sub>4</sub> :1%Tb | CaWO <sub>4</sub> :1%Tm | CaWO <sub>4</sub> :(1%Eu,1%Tb) |
|-----------------------------------------|-------------------|-------------------------|-------------------------|-------------------------|--------------------------------|
| $a$ (Å)                                 | 5.248(1)          | 5.245(1)                | 5.246(1)                | 5.246(1)                | 5.244(2)                       |
| $c$ (Å)                                 | 11.390(3)         | 11.381(3)               | 11.384(3)               | 11.378(3)               | 11.378(4)                      |
| $V$ (Å <sup>3</sup> )                   | 313.6(2)          | 313.1(2)                | 313.3(2)                | 313.1(2)                | 312.9(3)                       |
| $x_O$                                   | 0.6543(8)         | 0.6567(9)               | 0.6554(9)               | 0.6604(10)              | 0.6608(11)                     |
| $y_O$                                   | 0.4969(7)         | 0.4906(7)               | 0.4948(7)               | 0.4908(7)               | 0.4816(8)                      |
| $z_O$                                   | 0.2097(3)         | 0.2109(4)               | 0.2103(4)               | 0.2110(4)               | 0.2116(4)                      |
| $U_{Ca}$ (Å <sup>2</sup> ) <sup>a</sup> | 0.46              | 0.97                    | 0.86                    | 1.30                    | 1.53                           |
| $U_W$ (Å <sup>2</sup> )                 | 1.51              | 0.96                    | 1.05                    | 0.89                    | 0.74                           |
| $U_O$ (Å <sup>2</sup> )                 | 0.99              | 1.17                    | 0.89                    | 1.40                    | 1.59                           |
| A–O (1) (Å)                             | 2.425(4)          | 2.399(4)                | 2.414(4)                | 2.392(5)                | 2.369(6)                       |
| A–O (2) (Å)                             | 2.429(4)          | 2.406(5)                | 2.421(5)                | 2.406(5)                | 2.375(5)                       |
| W–O (Å)                                 | 1.830(3)          | 1.866(4)                | 1.844(4)                | 1.875(4)                | 1.914(4)                       |
| $V_{AO_8}$ (Å <sup>3</sup> )            | 25.39             | 24.60                   | 25.08                   | 24.43                   | 23.58                          |
| $V_{WO_4}$ (Å <sup>3</sup> )            | 3.11              | 3.29                    | 3.18                    | 3.33                    | 3.54                           |
| $R_{wp}$                                | 7.09              | 7.65                    | 7.49                    | 7.65                    | 8.42                           |
| $\chi^2$                                | 1.42              | 1.48                    | 1.43                    | 1.51                    | 1.68                           |

<sup>a</sup> Atomic displacements parameters are given as  $100 \times U^{ij}$ .

**Table S2** Structural Parameters of Calcined Ln-Doped CaWO<sub>4</sub> Nanocrystals

|                                         | CaWO <sub>4</sub> | CaWO <sub>4</sub> :1%Eu | CaWO <sub>4</sub> :1%Tb | CaWO <sub>4</sub> :1%Tm | CaWO <sub>4</sub> :(1%Eu,1%Tb) |
|-----------------------------------------|-------------------|-------------------------|-------------------------|-------------------------|--------------------------------|
| $a$ (Å)                                 | 5.240(1)          | 5.240(1)                | 5.239(1)                | 5.238(1)                | 5.239(1)                       |
| $c$ (Å)                                 | 11.378(2)         | 11.373(2)               | 11.370(2)               | 11.368(2)               | 11.367(3)                      |
| $V$ (Å <sup>3</sup> )                   | 312.5(2)          | 312.2(2)                | 312.0(2)                | 311.8(2)                | 312.0(2)                       |
| $x_O$                                   | 0.6531(9)         | 0.6518(9)               | 0.6556(9)               | 0.6525(8)               | 0.6541(9)                      |
| $y_O$                                   | 0.5028(8)         | 0.4998(7)               | 0.4957(8)               | 0.4944(7)               | 0.4890(7)                      |
| $z_O$                                   | 0.2108(4)         | 0.2108(4)               | 0.2105(4)               | 0.2106(3)               | 0.2115(4)                      |
| $U_{Ca}$ (Å <sup>2</sup> ) <sup>a</sup> | 0.33              | 0.92                    | 0.83                    | 0.61                    | 0.95                           |
| $U_W$ (Å <sup>2</sup> )                 | 0.92              | 1.21                    | 0.90                    | 1.27                    | 1.13                           |
| $U_O$ (Å <sup>2</sup> )                 | 0.96              | 0.67                    | 1.36                    | 0.33                    | 1.19                           |
| A–O (1) (Å)                             | 2.427(4)          | 2.415(4)                | 2.413(4)                | 2.401(4)                | 2.382(4)                       |
| A–O (2) (Å)                             | 2.452(5)          | 2.448(4)                | 2.420(5)                | 2.429(4)                | 2.412(5)                       |
| W–O (Å)                                 | 1.810(4)          | 1.818(4)                | 1.839(4)                | 1.838(3)                | 1.867(4)                       |
| $V_{AO_8}$ (Å <sup>3</sup> )            | 25.77             | 25.55                   | 25.03                   | 25.04                   | 24.45                          |
| $V_{WO_4}$ (Å <sup>3</sup> )            | 3.02              | 3.06                    | 3.16                    | 3.15                    | 3.30                           |
| $R_{wp}$                                | 8.25              | 8.10                    | 8.73                    | 7.83                    | 8.07                           |
| $\chi^2$                                | 1.55              | 1.75                    | 1.99                    | 1.66                    | 1.75                           |

<sup>a</sup> Atomic displacements parameters are given as  $100 \times U^{ij}$ .



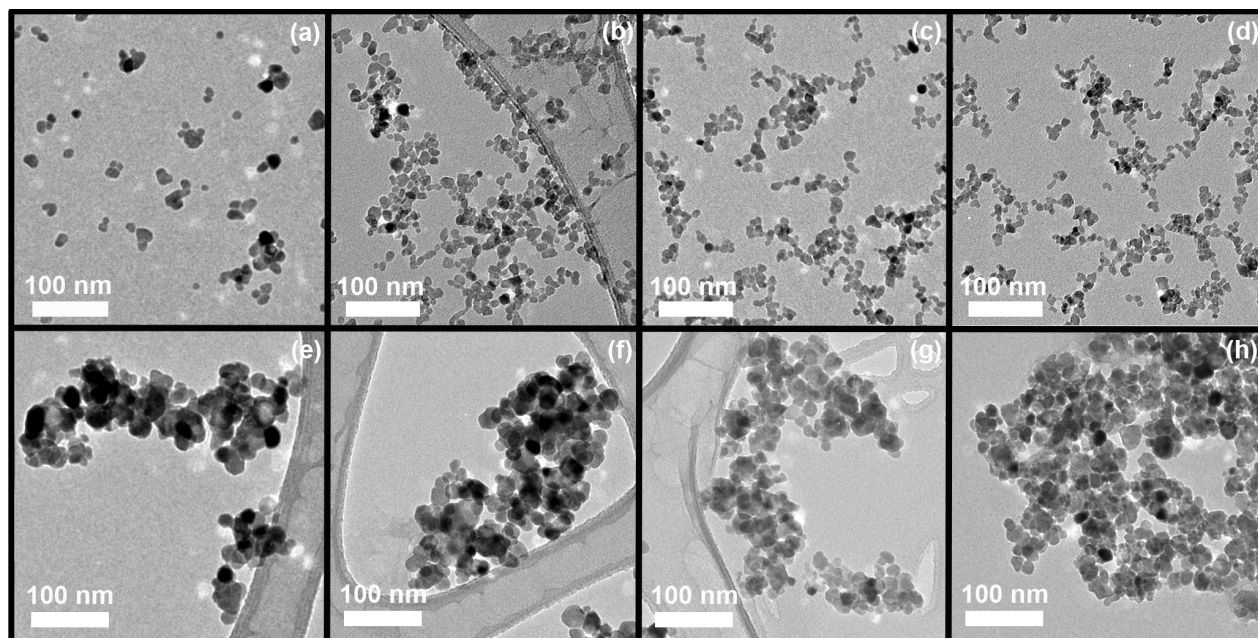

**Fig. S5** TEM images of the as-synthesized (a)  $\text{CaWO}_4$ , (b)  $\text{CaWO}_4\text{:1\%Tb}$ , (c)  $\text{CaWO}_4\text{:1\%Tm}$ , and (d)  $\text{CaWO}_4\text{: (1\%Eu, 1\%Tb)}$  and calcined (e)  $\text{CaWO}_4$ , (f)  $\text{CaWO}_4\text{:1\%Tb}$ , (g)  $\text{CaWO}_4\text{:1\%Tm}$ , and (h)  $\text{CaWO}_4\text{: (1\%Eu, 1\%Tb)}$  nanocrystals.

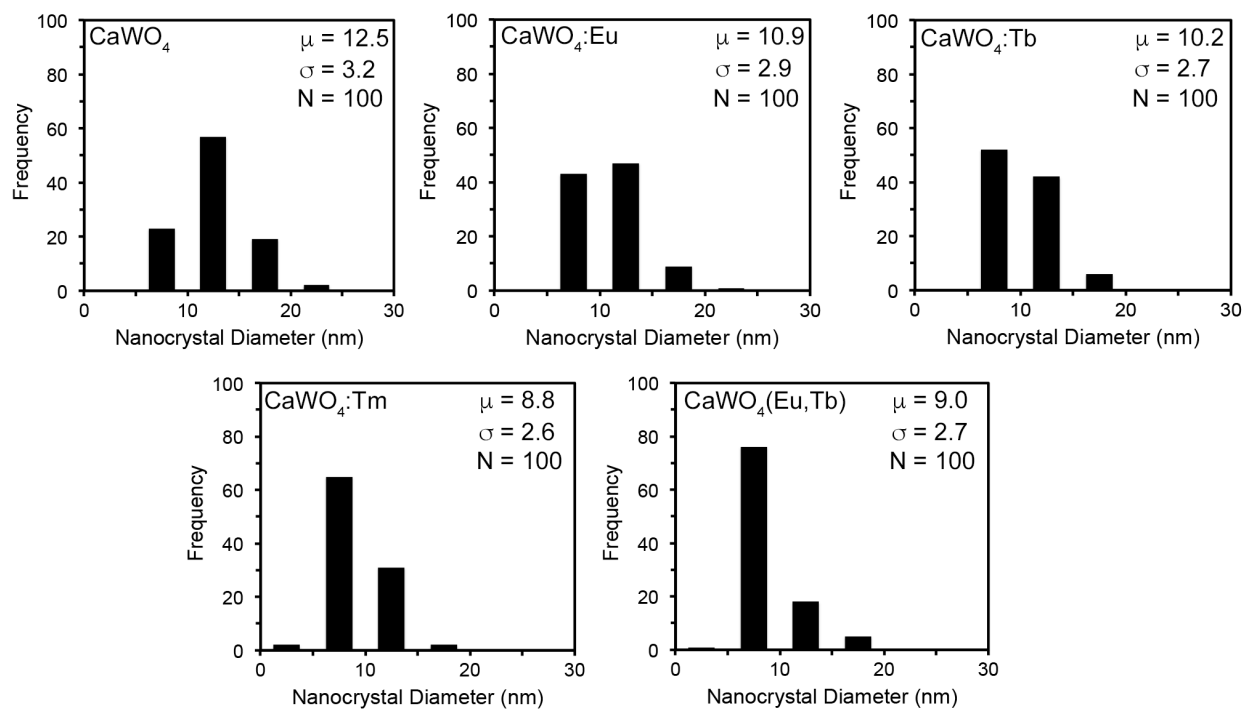

**Fig. S6** Nanocrystal size distribution histograms for the as-synthesized  $\text{CaWO}_4:\text{Ln}$  nanocrystals. The total number of nanocrystals counted (N), mean diameter ( $\mu$ ) in nm, and standard deviation ( $\sigma$ ) in nm are indicated.

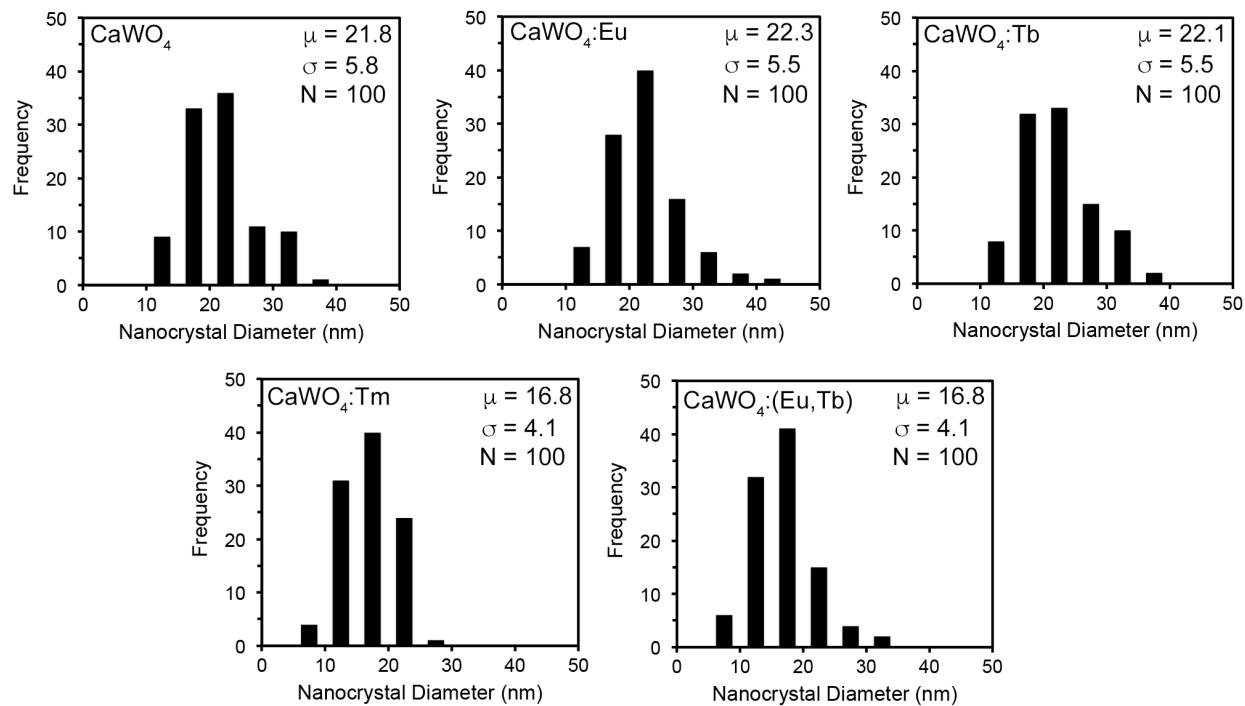

**Fig. S7** Nanocrystal size distribution histograms for the calcined  $\text{CaWO}_4:\text{Ln}$  nanocrystals. The total number of nanocrystals counted (N), mean diameter ( $\mu$ ) in nm, and standard deviation ( $\sigma$ ) in nm are indicated.

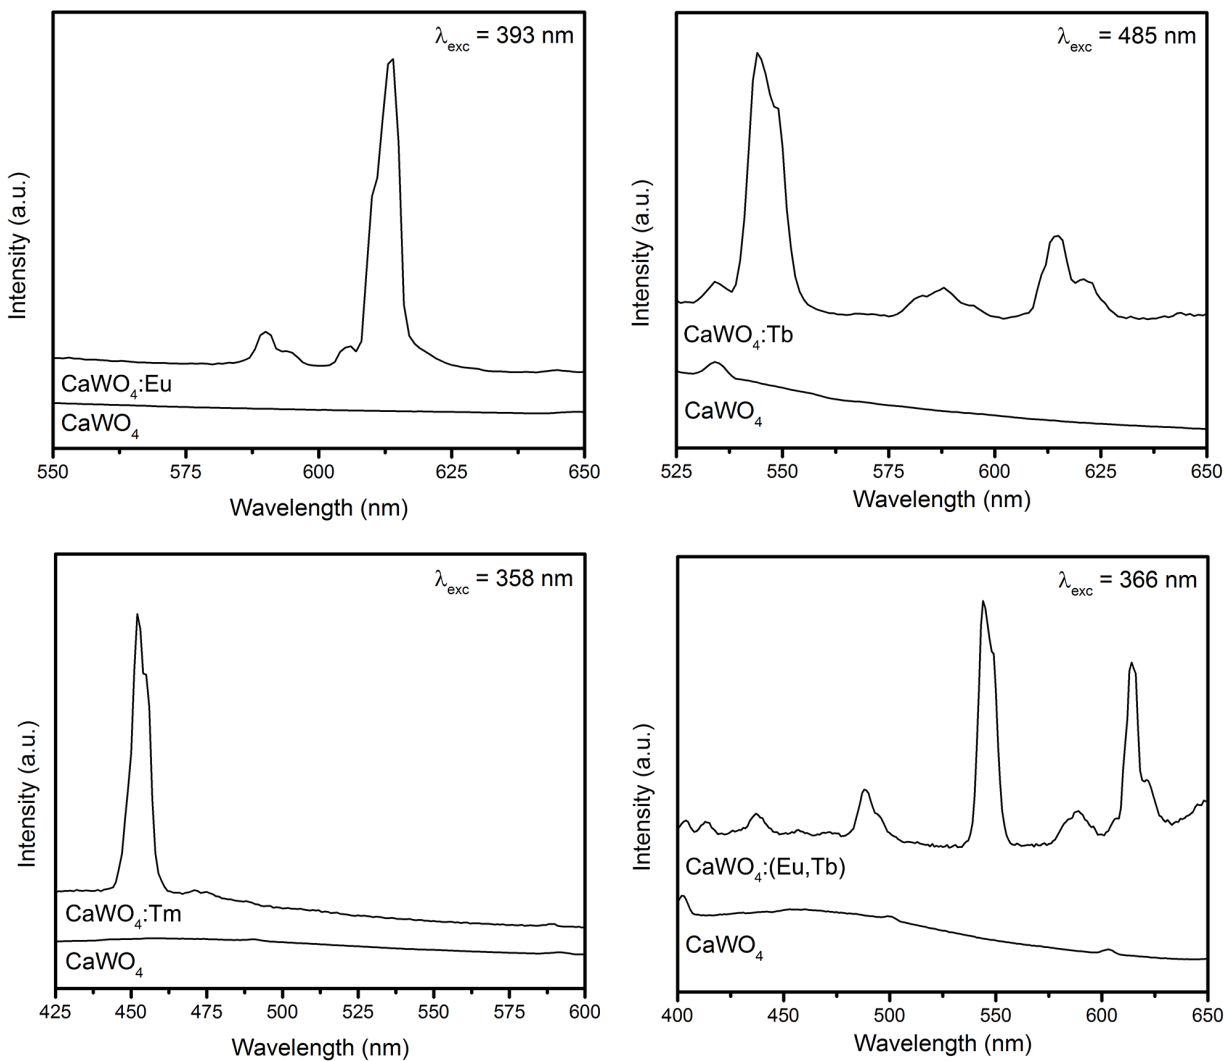

**Fig. S8** Room temperature emission spectra for calcined  $\text{CaWO}_4$  nanocrystals at the relevant excitation wavelengths. The room temperature emission spectra for the calcined  $\text{CaWO}_4:\text{Ln}$  nanocrystals are also provided.

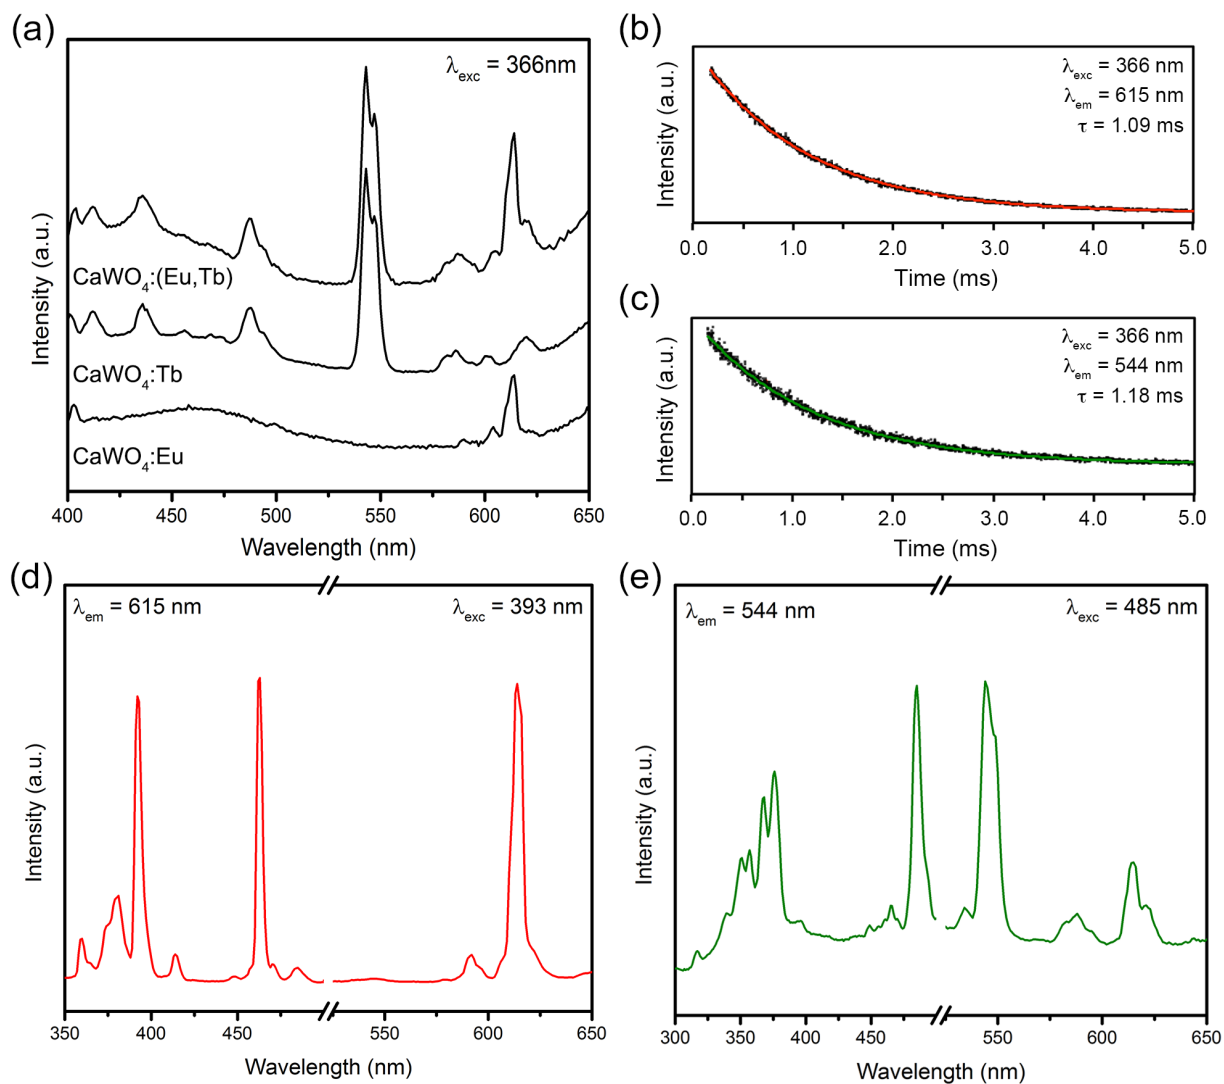

**Fig. S9** (a) Room temperature emission spectra for calcined  $\text{CaWO}_4:1\%\text{Eu}$ ,  $\text{CaWO}_4:1\%\text{Tb}$ , and  $\text{CaWO}_4:(1\%\text{Eu},1\%\text{Tb})$  nanocrystals upon excitation at 366 nm. Photoluminescence decay curves for  $\text{CaWO}_4:(1\%\text{Eu},1\%\text{Tb})$  nanocrystals monitored at (b) 615 and (c) 544 nm. The associated excitation and emission wavelengths, and lifetimes ( $\tau$ ) are also provided. Room temperature emission spectra for  $\text{CaWO}_4:(1\%\text{Eu},1\%\text{Tb})$  nanocrystals upon excitation at (d) 393 and (e) 485 nm.
